# Supplementary material for: Selenium-Nanoparticles-Loaded Chitosan/Chitooligosaccharide Microparticles and Their Antioxidant Potential: A Chemical and In Vivo Investigation
Source: MDPI journal article supplement (doi:10.3390/pharmaceutics12010043), 2020-01-03
Supplement: s1 [file s1]

# Supplementary Materials: Selenium-Nanoparticles-Loaded Chitosan/Chitooligosaccharide Microparticles and Their Antioxidant Potential: A Chemical and in Vivo Investigation

Kaikai Bai\*, Bihong Hong, Wenwen Huang and Jianlin He

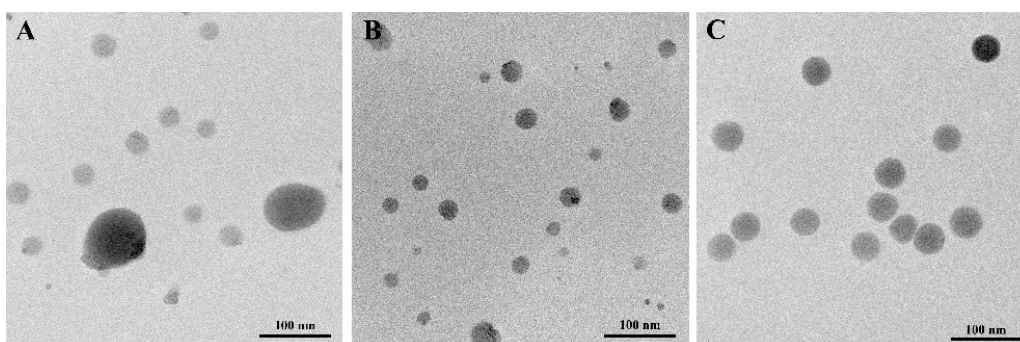

**Figure S1.** The SEM images of SeNPs when they were initially synthesized in (A) water, (B) aqueous COS (2.5 kDa) and (C) aqueous CS (37 kDa).

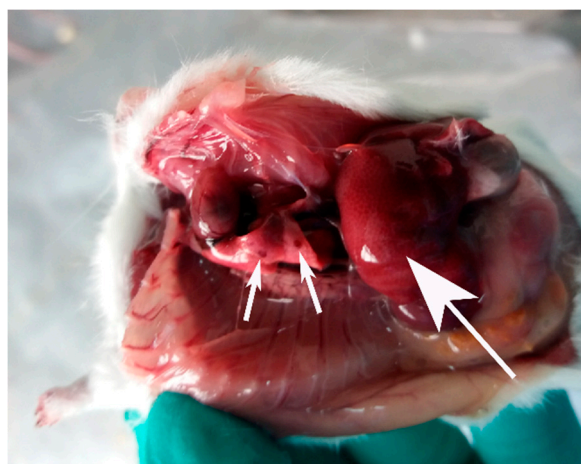

**Figure S2.** Organ pathology induced by SeNPs-CS/COS-Ms or selenite in mice, with the small arrows indicating hemorrhagia points in lungs and the bigger arrow indicating the abnormal liver.

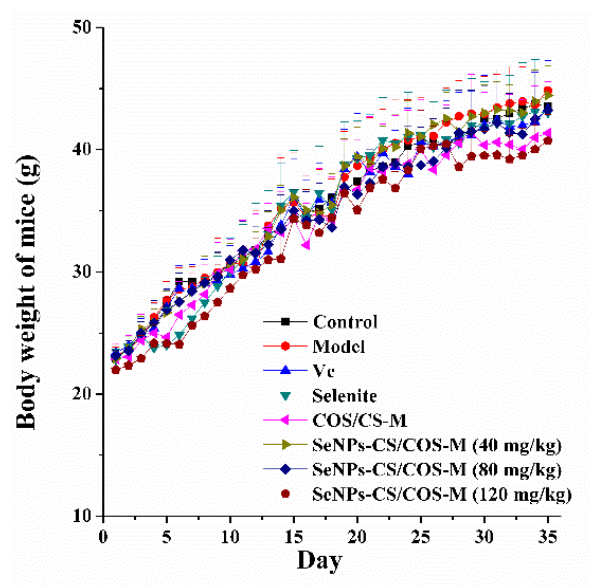

**Figure S3.** The body weight of KM mice before ethanol challenge.
